# Supplementary material for: lncRNA-Six1 Is a Target of miR-1611 That Functions as a ceRNA to Regulate Six1 Protein Expression and Fiber Type Switching in Chicken Myogenesis
Source: PubMed Central journal article supplement (PMC6315877; doi:10.3390/cells7120243), 2018-12-04

**Table S1.** Primers used for real-time PCR.

| Gene name      | Primer sequences (5' to 3')                           | Annealing temperature (°C) | Accession Number |
|----------------|-------------------------------------------------------|----------------------------|------------------|
| lncRNA-Six1    | F: CTCGTGAGAAGGGGGCAAAA<br>R: GAAGGCGAAACCCAAAACCG    | 56                         | -                |
| <i>Six1</i>    | F: GTCAGCAACTGGTTCAAGA<br>R: AGGAGGACCGAGTTCTGAT      | 59                         | NM_001044685.1   |
| <i>MYOD</i>    | F: GCTACTACACGGAATCACCAAAT<br>R: CTGGGCTCCACTGTCACTCA | 53                         | NM_204214.2      |
| <i>MYOG</i>    | F: CGGAGGCTGAAGAAGGTGAA<br>R: CGGTCCTCTGCCTGGTCAT     | 53                         | NM_204184.1      |
| <i>MyHC</i>    | F: CTCCTCACGCTTTGGTAA<br>R: TGATAGTCGTATGGGTGGT       | 53                         | NM_001319304.1   |
| <i>Wnt4</i>    | F: GGAGGCAGCGTTCGTCTA<br>R: GGCAATGTTATCGGAGCAG       | 56                         | NM_204783.1      |
| <i>Tnnc2</i>   | F: GAGCAGCAAAGATGGCGTCA<br>R: ATCACCGTGCCCAACTCCTT    | 57                         | NM_205450.2      |
| <i>Tnnt3</i>   | F: AGAGGGAAGAAGCAAACAGC<br>R: GTCCACAGTTCCTTAGCCT     | 57                         | NM_204922.2      |
| <i>Srl</i>     | F: CCTCCTCGGGCTGGATGACA<br>R: GTTCTTGCTGCTGCGGTTT     | 56                         | NM_205329.1      |
| <i>Sox6</i>    | F: TCAGGTTCAGGGTCACATGCC<br>R: TIGCTGGAGCTGTAAAGGGC   | 56                         | NM_001318451.1   |
| <i>Tnnc1</i>   | F: GTTGAGCAGTTGACAGAAGA<br>R: GAACCATCATAACAAGGAAC    | 57                         | NM_205133.1      |
| <i>Tnni1</i>   | F: GAGGAGTGGGAGCAGGAGAT<br>R: TTCGTCCACAATCTCAACCT    | 57                         | XM_004934839.2   |
| <i>Tnnt1</i>   | F: GAGCCGCACGGAGAAGGAGC<br>R: CCCGAAGTGGGGCATGTTGG    | 57                         | NM_205114.1      |
| <i>β-actin</i> | F:GATATTGCTGCGCTCGTTG<br>R:TTCAGGGTCAGGATACCTCTTT     | 50-65                      | NM_205518.1      |

**Table 2.** Oligonucleotide sequences in this study.

| Fragment name      | Sequences (5' to 3')   |
|--------------------|------------------------|
| miR-1611 mimic     | GGAGGGCUUGCAGGCGGUGUGC |
| miR-1611 inhibitor | GCACACCGCCUGCAAGCCCUCC |
| si-lncRNA-Six1     | GCTTATCTCAGCGGTATA     |
| ASO-lncRNA-Six1    | TTAGCAGACACGCGGTCACG   |
| si- <i>Six1</i>    | GGGAGAACACGGAGAACAA    |

**Table S3.** Primers used for vector construction.

| Primer name            | Primer sequences (5' to 3')                        |
|------------------------|----------------------------------------------------|
| pSDS-lncRNA-Six1       | F: GGGGGTCTCTAGTGGCCTGCTCCTGCAGCCCC                |
|                        | R: GCCGGTCTCGTGGGTTTTTTTCCTTTTTCTTTTT              |
| pSDS-Six1              | F: GGGGGTCTCTAGTGATGTCGATGCTGCCGTCGTTCG            |
|                        | R: GCCGGTCTCGTGGGCGTTCAGGATCACCGTCCGCTA            |
| lncRNA-Six1 position 1 | F: CCGCTCGAGCCTCGGGTCTGGCAAAT                      |
|                        | R: ACGCGT <b>CGAC</b> CCGGCCTTAGAAATAAGCCTACC      |
| lncRNA-Six1 position 1 | F: CAGCAAGTGGATGGGAAAGGCTAAAGATCCAACACAAACCTC      |
|                        | R: GAGGTTTGTGTTGGATCTTTAGCCTTCCCATCCACTTGCTG       |
| lncRNA-Six1 position 2 | F: CCGCTCGAGCAACATCACAAGCACTAAAA                   |
|                        | R: ACGCGT <b>CGACT</b> GAGGGTGTCTTTATGGCA          |
| lncRNA-Six1 position 2 | F: CACCGCCGGCCACAGCTCGGCTAAAGACCCGGCCGGCCGCTG      |
|                        | R: CACGGCCCGCCGGTCTTTAGCCGAGCTGTGGCCGGCCGGTG       |
| <i>Six1</i> 3' UTR WT  | F: CCGCTCGAGTGGACACGGACTCTCGGT                     |
|                        | R: ACGCGT <b>CGAC</b> ATTTATGGGCGCAATGG            |
| <i>Six1</i> 3' UTR MT  | F: AAATGCAGAGAGCGGCAGAACTAAAGAGGCCTTTCGAGTCA       |
|                        | R: TGA <b>ACTCGAAAGGCCTCTTTAGTTCTGCCGCTCTGCATT</b> |

Sequences in bold represent the enzyme cutting sites.

**Figure S1.** Identification of muscle fiber types between breast muscle and leg muscle. (A) H&E staining of transverse sections of breast muscles and leg muscles from 7-week-old XH chickens. (B) Muscle fiber area of breast muscles and leg muscles of 7-week-old XH chickens. (C) Muscle fiber diameter of breast muscles and leg muscles of 7-week-old XH chickens. (D) Immunofluorescence analysis of MYH1A/MYH7B-staining cells of breast muscles and leg muscles in 7-week-old XH chickens. (E) Relative MYH1A/MYH7B expression in breast muscles and leg muscles of 7-week-old XH chickens. (F) Relative protein expression of MYH1A and MYH7B in breast muscles and leg muscles of 7-week-old XH chickens. The numbers shown below the bands were fold-changes of band intensities relative to the control. Band intensities were quantified by ImageJ and normalized to GAPDH. Data are expressed as a fold change relative to the control. There was only one western blot performed per treatment, and therefore  $n = 1$ . In all panels, results are expressed as the mean  $\pm$  S.E.M. of three replicates. Statistical significance of differences between means was assessed using an unpaired Student's *t*-test. (\*  $P < 0.05$ ; \*\*  $P < 0.01$ ) vs. NC, negative control.

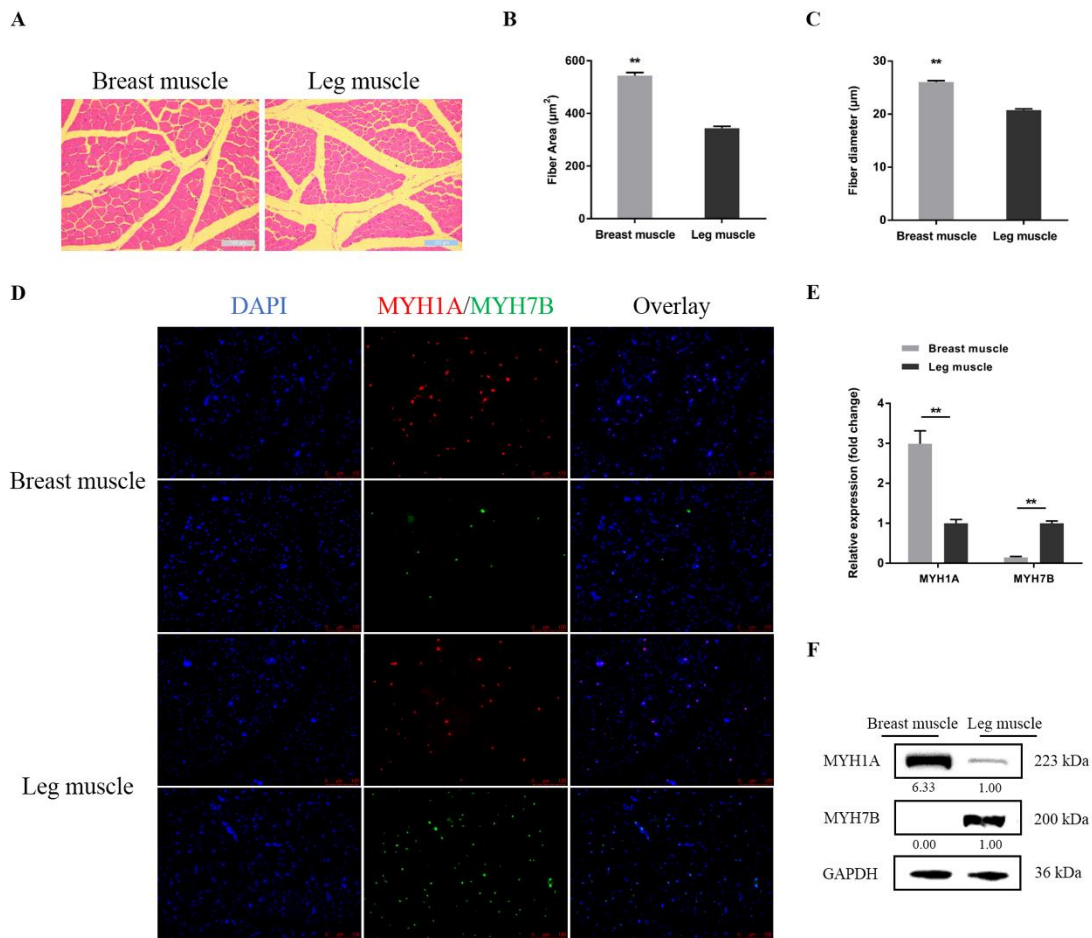

Supplement: cells-07-00243-s001.pdf [file cells-07-00243-s001.pdf]
